# Supplementary material for: Repurposing Glutathione Transferases: Directed Evolution Combined with Chemical Modification for the Creation of a Semisynthetic Enzyme with High Hydroperoxidase Activity
Source: MDPI journal article supplement (doi:10.3390/antiox13010041), 2023-12-25
Supplement: s1 [file s1]

**Table S1.** The sequence of primers used in mutagenesis reactions at amino acid position 114.

|                   |                                          |
|-------------------|------------------------------------------|
| <b>CysSh14Trp</b> | 5'- GGAAGATT <b>TGG</b> ACATCAAAAGC-3'   |
| <b>CysSh14Trp</b> | 5'- CCTTTTGATGT <b>CCA</b> AATCTTCC-3'   |
| <b>CysSh14Phe</b> | 5'- GGAAGATT <b>TTT</b> TACATCAAAAGC-3'  |
| <b>CysSh14Phe</b> | 5'- CCTTTTGATGT <b>AAA</b> AATCTTCC-3'   |
| <b>CysSh14Leu</b> | 5'- GGAAGATT <b>TTT</b> TAACATCAAAAGC-3' |
| <b>CysSh14Leu</b> | 5'- CCTTTTGATGT <b>TAA</b> AATCTTCC-3'   |
| <b>CysSh14Ala</b> | 5'- GGAAGATT <b>GCT</b> ACATCAAAAGC-3'   |
| <b>CysSh14Ala</b> | 5'- CCTTTTGATGT <b>AGC</b> AATCTTCC-3'   |
